1 **Connecting genetic incompatibilities with natural selection on additive genetic variation during**  
2 **adaptive radiation**

3 *Greg M. Walter<sup>1\*</sup>, J. David Aguirre<sup>2</sup>, Melanie J Wilkinson<sup>1</sup>, Thomas J. Richards<sup>3</sup>, Mark W. Blows<sup>1</sup> and*  
4 *Daniel Ortiz-Barrientos<sup>1</sup>*

5 <sup>1</sup>University of Queensland, School of Biological Sciences, St. Lucia QLD 4072, Australia

6 <sup>2</sup>Massey University, School of Natural and Computational Sciences, Auckland 0745, New Zealand

7 <sup>3</sup>Swedish University of Agricultural Science, Department of plant Biology, Uppsala, 75007, Sweden

8 \* Corresponding Author: Greg M. Walter

9 Email: [g.walter@bristol.ac.uk](mailto:g.walter@bristol.ac.uk)

10 Address: School of Biological Sciences, Life Sciences Building

11 University of Bristol, Bristol, UK BS8 1TQ

12 **Keywords:** natural selection, trade-offs, additive genetic variance, selection gradient, response to  
13 selection, adaptive divergence, adaptive radiation, genetic incompatibilities, reproductive isolation,  
14 macroevolution

15

16 **Abstract**

17 Evolutionary biologists have long sought to identify the links between micro and macroevolution to better  
18 understand how biodiversity is created. Despite this pursuit, it remains a challenge to understand how  
19 allele frequency changes correlate with the evolution of morphological diversity, and the build-up of  
20 reproductive isolation amongst taxa. To connect mechanisms of microevolution with patterns of  
21 diversification, we tested the adaptive importance of alleles underlying genetic incompatibilities, and the  
22 consequences for predicting evolutionary trajectories of multiple ecotypes of an Australian wildflower.  
23 Using a quantitative genetics crossing design, we produced an F4 generation Advanced Recombinant  
24 Form (ARF) between four contrasting ecotypes, which we phenotyped in the glasshouse (N=770) and  
25 transplanted into the four natural habitats (N=14,265 seeds), alongside the parental ecotypes. F2 hybrid  
26 breakdown was associated with the loss of extreme phenotypes and habitat-specific genetic variation in  
27 field performance. Genetic trade-offs existed among habitats, but only in axes describing smaller amounts  
28 of genetic variance for fitness. Habitats that showed stronger patterns of adaptive divergence for native  
29 versus foreign ecotypes, also showed lower genetic variance in fitness of the ARF. Integrating data from  
30 the field and glasshouse predicted patterns of selection on morphological traits in a similar direction to the  
31 parental ecotypes. Overall, our results provide strong empirical evidence linking ecotype specific alleles  
32 with phenotypic divergence, fitness trade-offs, rapid adaptation and the accumulation of genetic  
33 incompatibilities among recently derived ecotypes. Our data connects microevolutionary change with  
34 macroevolution through adaptive radiation, where selection for environment specific alleles creates rapid  
35 adaptive divergence leading to speciation.

36

## 37 **Introduction**

38 Historically, evolutionary biologists have long discussed the link between adaptation and speciation to  
39 understand how natural selection can reconcile microevolutionary genetic changes with  
40 macroevolutionary species diversification. We know that natural selection acts largely upon the additive  
41 effects of genes (Hill et al. 2008), but we also widely accept that species form when interactions among  
42 genes create intrinsic reproductive isolation between diverging lineages (Dobzhansky 1937; Muller  
43 1942). Therefore, adaptation occurs when natural selection increases the frequency of beneficial alleles,  
44 but the role of these same alleles in creating intrinsic reproductive isolation remains unresolved. This gap  
45 in our understanding of evolution is largely due to the difficulty of estimating natural selection in the wild  
46 (Pujol et al. 2018), and connecting it to the accumulation of intrinsic reproductive isolation (Baack et al.  
47 2015). A more detailed understanding of natural selection can identify whether alleles underlying  
48 adaptation are also those contributing to reproductive isolation, and how this leads to adaptive radiation.  
49 Alleles can confer an adaptive advantage in one environment, but with deleterious effects in other  
50 environments, leading to fitness tradeoffs (Anderson et al. 2011; Anderson et al. 2013). If environment  
51 specific alleles evolve in the absence of gene flow, they will be novel in relation to genotypes from  
52 alternative environments and could fail when tested in alternative genetic backgrounds, creating  
53 reproductive isolation (Coyne and Orr 2004). Under this scenario, environment specific alleles can lead to  
54 the evolution of Bateson-Dobzhansky-Muller genetic incompatibilities when incompatible with  
55 alternative genetic backgrounds (Dobzhansky 1937; Muller 1942), meaning alleles underlying adaptive  
56 traits in one ecotype can lead to hybrid breakdown when they are introgressed into an alternative ecotype  
57 (Kondrashov 2003; Navarro and Barton 2003). Using artificial hybridization to simulate gene flow among  
58 divergent ecotypes, we can assess the consequences for phenotypic and genetic variation before and after  
59 genetic incompatibilities arise. If alleles underlying adaptation to contrasting environments concomitantly  
60 create fitness trade-offs and reproductive isolation, we can use changes in environment specific allele  
61 frequencies to connect micro and macroevolution.

62 Natural selection is unlikely to affect single traits in isolation, favoring beneficial combinations of traits  
63 and the evolution of multivariate phenotypes (Lande 1979; Cheverud 1982). Adaptation will be  
64 constrained when traits share genetic variance and genetic architecture, rather than natural selection,  
65 determines evolutionary trajectories (Lande and Arnold 1983; Arnold 1992; Schluter 1996). In this way,  
66 adaptive alleles will likely increase in frequency, but only if selection on genetically correlated traits  
67 allow it. Genetic correlations are expected to remain stable, at least in the short term, which would make  
68 rapid adaptive divergence leading to adaptive radiation difficult (Walsh and Blows 2009). However,  
69 recent studies have shown that matrices that capture the genetic relationship among traits (G-matrices)  
70 can potentially evolve rapidly (Doroszuk et al. 2008; Eroukhmanoff and Svensson 2011; Walter et al.  
71 2018a), questioning the role of constraints in adaptive radiation. If genetic correlations can evolve in  
72 response to natural selection, then environment specific allele frequency changes can overcome genetic  
73 constraints to promote rapid adaptive divergence, and the path to adaptive radiation will be more  
74 straightforward. However, the consequences of this evolutionary release might impact the ability of  
75 populations to interbreed, incidentally leading to the evolution of intrinsic reproductive isolation.

76 We explore the evolutionary connection between adaptation and speciation using the adaptive radiation of  
77 an Australian native wildflower, *Senecio pinnatifolius*. We focus on four ecotypes within this species  
78 complex including two coastal types found on sandy dunes (Dune ecotype, *Senecio pinnatifolius* var.  
79 *pinnatifolius*) and rocky headlands (Headland ecotype, *S. pinnatifolius* var. *maritimus*), and two inland  
80 ecotypes that occur in moist sub-tropical rainforest (Tableland ecotype, *S. pinnatifolius* var. *serratus*) and  
81 dry sclerophyll woodland (Woodland ecotype, *S. pinnatifolius* var. *dissectifolius*) (Ali 1969; Radford et  
82 al. 2004). Previous work has shown that these ecotypes arose as a result of adaptation to divergent natural  
83 selection (Melo et al. 2014; Walter et al. 2016), resulting in habitat specific plant morphologies, fitness  
84 trade-offs and immigrant inviability among contrasting habitats (Melo et al. 2014; Richards and Ortiz-  
85 Barrientos 2016; Richards et al. 2016; Walter et al. 2016; Walter et al. 2018a; Walter et al. 2018b).

86 Artificial hybridization among ecotypes produced vigorous F1 offspring, with hybrid breakdown  
87 observed at the F2 generation as a strong reduction in reproductive capacity, suggesting incompatible  
88 alleles have arisen among ecotypes. Fitness recovery in the subsequent generation suggested genetic

89 incompatibilities arose as a breakup of coadapted gene complexes (Walter et al. 2016). Combined with  
90 evidence of a recent origin (Roda et al. 2013a), patterns of morphological and reproductive divergence  
91 suggest these ecotypes have recently undergone adaptive radiation.

92 Here, we employ a combination of glasshouse and field experiments to explore the implications of  
93 artificial hybridization during adaptive radiation. Using a quantitative genetic crossing design among the  
94 four ecotypes, we created an F4 generation advanced recombinant form (ARF). Alongside the parental  
95 ecotypes, we phenotyped the ARF in the glasshouse and performed a large-scale field transplant across  
96 the four natural habitats. If ecotype specific alleles connect adaptation and speciation during adaptive  
97 radiation, we hypothesized that following F2 hybrid breakdown we would observe: 1) Reductions in  
98 phenotypic variance compared to parental ecotypes, 2) Low genetic variance for fitness in habitats  
99 associated with stronger adaptive divergence in parental ecotypes, 3) Reduced genetic trade-offs among  
.00 habitats compared to parental ecotypes, and 3) Habitat specific selection gradients that align with the  
.01 direction of phenotypic divergence in the parental ecotypes. Testing these predictions, we demonstrate  
.02 that adaptive radiation was produced by ecotype specific alleles that created phenotypic divergence,  
.03 adaptive genetic variance, genetic incompatibilities and reduced genetic constraints to adaptation.

## .04 **Methods**

### .05 *Crossing design*

.06 To create the ARF we first sampled seeds from one natural population from each of the four ecotypes,  
.07 which we germinated and grew at the University of Queensland glasshouses. We sampled seeds for the  
.08 Dune and Headland ecotypes at Lennox Head, NSW (-28.783005, 153.594018 and -28.813117,  
.09 153.605319, respectively), from the Tableland ecotype at O'Reilley's Rainforest Retreat, Qld (-  
.10 28.230508, 153.135078) and the Woodland ecotype at Upper Brookfield, Qld (-27.479946, 152.824709).  
.11 At each location, we collected seeds from 24-49 plants separated from each other by at least 10 m to  
.12 minimize the likelihood of sampling close relatives. Two seeds from each individual sampled were  
.13 germinated and grown in the University of Queensland glasshouses, which then formed the base  
.14 population for our crossing design, outlined below. To grow plants, we first scarified each seed and

.15 placed them in glass petri dishes containing moist filter paper. After leaving them in the dark for two days  
.16 we transferred the germinated seeds to a 25°C constant temperature growth room with 12h:12h light:dark  
.17 photoperiod. After one week, we transferred the seedlings to the glasshouse and transplanted them into  
.18 85mm pots containing a mixture of 70% pine bark and 30% coco peat with slow release osmocote  
.19 fertilizer and 830g/m<sup>3</sup> of Suscon Maxi insecticide. We conducted controlled crosses on mature plants by  
.20 rubbing two mature flower heads together, labeling the flower heads and collecting the seeds as they  
.21 emerged.

.22 We created the ARF ensuring each ecotype contributed equally and ensuring that at each generation (see  
.23 Figure 1C), all full-sibling families (hereafter, ‘families’) contributed equally to the next generation. First,  
.24 we grew plants for the base population from seeds sampled from the natural populations and performed  
.25 crosses among the ecotypes ( $n = 41-60$  individuals/ecotype) to create all combinations of F1 hybrids ( $n =$   
.26 12 crossing combinations;  $n = 20-25$  families/cross type). We then mated among all combinations of  
.27 crosses in the F1 generation such that all F2 families ( $n = 24$  crossing combinations;  $n = 17-22$  families  
.28 /cross type) possessed a grandparent from each of the original parental ecotypes (e.g., F1<sub>Dune,Headland</sub> ×  
.29 F1<sub>Tableland,Woodland</sub>). Given strong reductions in intrinsic fitness was observed in a previous Dune x  
.30 Headland F2 hybrid (Walter et al. 2016), we maximized the number of F1 crosses to produce 458 F2  
.31 families in total. We grew one individual from each family. Reductions in fitness were observed as F2  
.32 hybrid sterility (42% of F2 individuals were successfully mated compared to >90% in F1 hybrids) and  
.33 reduced fertility (49% reduction in seed set compared to F1 hybrids) (Walter et al. 2016). Consequently,  
.34 we divided the F2 individuals that produced flowers into three replicate crossing lines to maintain  
.35 replicates of the construction of the ARF. We then randomly mated among all F2 individuals within each  
.36 line ( $n = 4-12$  families/F2 cross type; total F2 families crossed  $N = 202$ ) to produce the F3 generation ( $N$   
.37 = 259 families), ensuring that each family contributed equally. We then produced the F4 generation by  
.38 first growing one individual from each F3 family and randomly designating each individual as a sire or  
.39 dam. We then mated 115 sires to 114 dams in a full-sibling, half-sibling crossing design to produce 198  
.40 families for the F4 generation. The numbers of families and individuals used to create each generation of  
.41 the ARF are listed in Table S1.

.42 In the following analyses we examine results from two experiments using the ARF. In experiment 1, we  
.43 grew the ARF in the glasshouse to estimate genetic variance underlying morphological traits. In  
.44 experiment 2, we transplanted seeds of the ARF into the four habitats to compare the fitness of the ARF  
.45 with the parental ecotypes. We then used the field fitness of the ARF (experiment 2) to quantify the  
.46 genetic covariance in performance among transplant habitats and identify genotype-by-environment  
.47 interactions that would indicate genetic trade-offs among habitats. Finally, to quantify differences in  
.48 natural selection among habitats, we combined the data from both experiments and estimated the genetic  
.49 covariance between morphological traits in the glasshouse (experiment 1) and field fitness in each habitat  
.50 (experiment 2).

### .51 *Experiment 1: Glasshouse phenotypes*

.52 To estimate genetic variance underlying morphological traits we grew four individuals from each full  
.53 sibling family of the ARF ( $n = 198$  full-sibling families, total  $N = 770$  individuals) in 30 cell growth trays  
.54 containing the same potting media described above. Alongside the ARF we grew four individuals from  
.55 ~25 full sibling families for each of the parental ecotypes ( $N = 366$  individuals). Plants were grown in a  
.56 25°C controlled temperature room with a 12h:12h day:night photoperiod. After eight weeks of growth we  
.57 measured plant height and sampled one fully mature leaf for each plant. We used the software ‘Lamina’  
.58 to analyse the scanned leaf and quantify six variables relating to leaf size and leaf shape (Bylesjo et al.  
.59 2008). Using the outputs of Lamina, we quantified leaf morphology using leaf area, leaf area<sup>2</sup> / leaf  
.60 perimeter<sup>2</sup> as a measure of leaf complexity, leaf circularity, number of indents standardized by leaf  
.61 perimeter, leaf indent width and leaf indent depth.

### .62 *Experiment 2: Field transplant*

.63 Seeds from the F4 generation of the ARF were transplanted into each of the habitats. At each transplant  
.64 habitat, we planted 18 seeds from each full-sibling family ( $n = 198$ ) divided equally amongst six  
.65 experimental blocks (habitat  $n \approx 3,500$  seeds, total  $N = 14,265$  seeds). Alongside the ARF we  
.66 transplanted seeds from the populations of parental ecotypes used to create the ARF (for each population  
.67  $n = 180$  seeds/habitat) (analysed previously in Walter et al. 2016). See Walter et al. (2016); Walter et al.

.68 (2018b) for a detailed description of the field experiment. Briefly, we glued each seed to a toothpick  
.69 using non-drip glue and planted them in 25mm x 25mm plastic grids in March 2014. Field observations  
.70 suggested that seeds in the natural populations can germinate year-round given sufficient rain. Given we  
.71 wanted to standardise germination time to estimate post-germination development and survival, to  
.72 replicate natural germination conditions we suspended shadecloth (50%) 15cm above each experimental  
.73 block and watered them daily for three weeks. During the initial three-week period we measured  
.74 emergence and mortality daily. Following the initial three weeks we measured survival and development  
.75 at weeks 4, 5, 7 and 9, and then monthly until 20 months at which time there were fewer than 20% of  
.76 germinated plants remained, and we ceased the experiment. The measures of fitness we recorded were:  
.77 whether each seedling emerged, whether each seedling reached 10 leaves (as a measure of seedling  
.78 establishment) and produced a bud (reached maturity). All measures of fitness were collected as binary  
.79 data.

#### .80 *Implementation of Bayesian models*

.81 In the subsequent analyses we implemented Bayesian models to 1) compare field performance  
.82 (experiment 2) of the ARF with the parental ecotypes, 2) identify whether genotype-by-environment  
.83 interactions create genetic trade-offs among transplant habitats (experiment 2), 3) estimate genetic  
.84 (co)variance of morphological traits for the ARF (experiment 1), and 4) estimate the genetic covariance  
.85 between morphological traits (experiment 1) and field performance (experiment 2), to identify differences  
.86 in natural selection on morphological traits, among habitats.

.87 All Bayesian models were implemented using R (R Core Team 2016) within the package ‘MCMCglmm’  
.88 (Hadfield 2010). From each model we extracted 1,000 Markov chain Monte Carlo (MCMC) samples,  
.89 which provided the posterior distribution for the parameters we were estimating. For each analysis, we  
.90 implemented Markov chains of different lengths (listed in Table S2), while ensuring that we included a  
.91 sufficient burn-in period and thinning interval to sample the parameters with autocorrelation values of  
.92 less than 0.05 and effective sample sizes exceeding 85% of the total number of samples, for all  
.93 parameters. We used uninformative parameter expanded priors and checked their sensitivity by re-



.94 implementing all models while adjusting the parameters and ensuring the posterior distribution did not  
.95 change.

.96 For the analyses estimating genetic variance, comparing estimates of genetic variance with zero provides  
.97 an uninformative test of significance because estimates are restricted to be greater than zero (positive-  
.98 definite). To create an informative significance test, we re-implemented each model with randomized  
.99 data, created by shuffling the parental information. For each model implemented on the observed data, we  
!00 re-implemented the same model on 1,000 randomizations of the data, and extracted the posterior mean for  
!01 each randomization. We then compared the distribution of means from models conducted on the  
!02 randomizations, to the mean of the observed posterior distribution. If the mean of the observed  
!03 distribution occurred outside the 95% Highest Posterior Density (HPD) interval for the random  
!04 distribution, we took this as evidence that we captured biologically important information for the  
!05 comparison of interest. As we were only interested in estimating the posterior mean of models  
!06 implemented on each randomization of the data, we could reduce computing time by reducing the total  
!07 number of sampling iterations. To do so, we maintained the same burn-in period and sampling interval to  
!08 ensure an identical mixing of MCMC chains, reducing only the total number of sampling iterations to the  
!09 number required to obtain a stable estimate of the mean. We calculated the number of sampling iterations  
!10 required using the models implemented on the observed data, which was different for each of the analyses  
!11 outlined below (Table S2).

### !12 *Comparing ARF and ecotype morphology*

!13 To compare differences in multivariate phenotype between the ARF and parental ecotypes, we  
!14 implemented a multivariate analysis of variance (MANOVA) on the seven morphological traits measured  
!15 in experiment 1. We first standardized all seven morphological traits to a mean of zero, and standard  
!16 deviation of one before including them as a multivariate response variable. To test whether the ARF was  
!17 phenotypically different to each ecotype we conducted a separate MANOVA for each pairwise  
!18 comparison between the parental ecotypes, and the ARF. We used a bonferroni corrected  $\alpha$ -value of  
!19 0.0125 ( $\alpha = 0.05 / n$ , where  $n$  represents the number of tests). To visualize differences among all ecotypes

!20 and the ARF we estimate  $\mathbf{D}$ , the variance-covariance matrix representing multivariate phenotypic  
!21 divergence. To do so, we first conducted another MANOVA that included all ecotypes (but not the ARF).  
!22 From this, we extracted the sums of squares and cross-product matrices for the ecotypes ( $\text{SSCP}_H$ ) and  
!23 error terms ( $\text{SSCP}_E$ ) to calculate their mean-square matrices by dividing by the appropriate degrees of  
!24 freedom ( $\text{MS}_H = \text{SSCP}_H / 3$ ;  $\text{MSE} = \text{SSCP}_E / 365$ ). Using the mean-square matrices we calculated  $\mathbf{D} =$   
!25  $(\text{MS}_H - \text{MS}_E) / nf$ , where  $nf$  represents the number of measured individuals per genotype in an unbalanced  
!26 design, calculated using equation 9 in Martin et al. (2008). Our D-matrix then represents divergence in  
!27 multivariate mean phenotype, among the parental ecotypes, after removing the residual phenotypic  
!28 variation. To visualize the phenotypic space occupied by the ARF relative to the parental ecotypes, we  
!29 decomposed  $\mathbf{D}$  into orthogonal axes (eigenvectors) and calculated the phenotype scores for the first two  
!30 eigenvectors for all ecotypes, and the ARF.

### !31 *Comparing ARF and ecotype field performance*

!32 We estimated fitness at early life history stages for the ARF and parental ecotypes transplanted into all  
!33 four habitats. To do so, we created a dummy variable that represented the ARF and native versus foreign  
!34 ecotypes in each habitat. We then used MCMCglmm to implement the model,

$$!35 \quad \mathbf{y}_{ijklm} = \mathbf{H}_i + \mathbf{P}_j + \mathbf{H}_i \times \mathbf{P}_j + \mathbf{B}_{k(i)} + \mathbf{L}_{l(j)} + \mathbf{e}_{m(ijkl)}, \quad (1)$$

!36 where transplant habitat ( $\mathbf{H}_i$ ), ARF/ecotype ( $\mathbf{P}_j$ ) and their interaction ( $\mathbf{H}_i \times \mathbf{P}_j$ ) were included as fixed  
!37 effects. Blocks within transplant habitat ( $\mathbf{B}_{k(i)}$ ) and replicate genetic lines within the ARF ( $\mathbf{L}_{l(j)}$ ) were  
!38 included as random effects, and  $\mathbf{e}_{m(ijkl)}$  represented the model error. We implemented equation 1 with  
!39 emergence, seedling establishment and maturity as a multivariate response variable ( $\mathbf{y}_{ijklm}$ ). As such, for  
!40 all ecotypes and the ARF, equation 1 calculated the probability of reaching maturity, conditional on the  
!41 previous life history stages.

### !42 *Quantifying divergent natural selection*

!43 We used the ARF to investigate differences in natural selection among contrasting natural habitats. To do  
!44 so, we conducted two further analyses. First, to identify whether natural selection created genetic trade-

!45 offs among habitats, indicated by a negative genetic covariance among habitats, we analysed field  
!46 performance using a genotype-by-environment covariance framework described below. Next, we  
!47 examined whether genetic selection on traits occurred in the direction of the native ecotypes. To do so,  
!48 we combined the morphology data from experiment 1, with field performance data in experiment 2 and  
!49 used the Robertson-Price Identity to estimate the genetic covariance between morphological traits and  
!50 field performance for each transplant habitat. We predicted that if natural selection on morphology  
!51 occurred in the direction of the original ecotypes, differences in selection gradients (among habitats)  
!52 would align with divergence in phenotype mean of the parental ecotypes.

### !53 *Genetic trade-offs among contrasting habitats*

!54 We investigated genotype-by-environment (G×E) interactions in the ARF using a character state  
!55 approach, where different environments represent different traits (Robinson and Beckerman 2013). To do  
!56 so, we used the field performance of the ARF and implemented

$$!57 \quad \mathbf{y}_{ijklmn} = \mathbf{L}_i + \mathbf{H}_j + \mathbf{S}_{k(il)} + \mathbf{D}_{l(ik)} + \mathbf{B}_{m(j)} + \mathbf{e}_{n(ijklm)}, \quad (2)$$

!58 where replicate genetic line of the ARF ( $\mathbf{L}_i$ ) and transplant habitat ( $\mathbf{H}_j$ ) were included as fixed effects.  
!59 We included sire ( $\mathbf{S}_{k(il)}$ ), dam ( $\mathbf{D}_{l(ik)}$ ) and block within habitat ( $\mathbf{B}_{m(j)}$ ) as random effects, with  
!60  $\mathbf{e}_{n(ijklm)}$  representing the residual error variance. For each term in the random component, we estimated  
!61 random intercepts for each habitat and the covariance among habitats. As such, for the sire and dam  
!62 components we estimated a 4×4 covariance matrix representing variance in each habitat, and covariance  
!63 among habitats. Information for estimating covariance among habitats is taken from individuals of the  
!64 same full-sibling families transplanted in each habitat. Consequently, we implemented equation 2 with a  
!65 heterogeneous residual covariance matrix. This allowed for different variances in each habitat, but fixed  
!66 residual covariances at zero because individuals (seeds) could not be planted in two habitats  
!67 simultaneously. We used three separate implementations of equation 2 for emergence, seedling  
!68 establishment and maturity included as binary univariate response variables ( $\mathbf{y}_{ijklmn}$ ).

!69 From equation 2,  $\mathbf{S}_{l(im)}$  represents one quarter of the additive genetic variance in each habitat, and one  
!70 quarter of the additive genetic covariance between habitats. We multiplied the sire variance component  
!71 ( $\mathbf{S}_{l(im)}$ ) by four and used the posterior mean as our observed estimate of additive genetic (co)variance for  
!72 field performance among the four habitats. The diagonal of the resulting G-matrices represents additive  
!73 genetic variance within a transplant habitat, with the off diagonal representing the genetic covariance  
!74 between habitats.

### !75 *Divergent natural selection on morphological traits*

!76 By linking genetic variance underlying morphological traits in the laboratory, with genetic variance  
!77 underlying field performance, we sought to quantify differences in natural selection among the transplant  
!78 habitats using the Robertson-Price Identity. A requirement for natural selection is genetic variance in both  
!79 morphological traits and field performance. The analysis of genetic variance underlying field  
!80 performance (described in the previous section) identified significant genetic variance for the ability to  
!81 reach maturity, in all four transplant habitats (see results). To identify the morphological traits with  
!82 genetic variation we used the morphology data from experiment 1 and implemented

$$!83 \quad \mathbf{y}_{ijklmn} = \mathbf{L}_i + \mathbf{S}_{j(ik)} + \mathbf{D}_{k(ij)} + \mathbf{S}_{j(ik)} \times \mathbf{D}_{k(ij)} + \mathbf{e}_{n(ijk)}, \quad (3)$$

!84 where replicate genetic line of the ARF ( $\mathbf{L}_i$ ) was included as a fixed effect and sire ( $\mathbf{S}_{j(ik)}$ ), dam ( $\mathbf{D}_{k(ij)}$ )  
!85 and their interaction ( $\mathbf{S}_{j(ik)} \times \mathbf{D}_{k(ij)}$ ) were random effects, with  $\mathbf{e}_{n(ijk)}$  as the residual variance. We  
!86 implemented equation 3 with plant height and six leaf morphology traits as a multivariate response  
!87 variable ( $\mathbf{y}_{ijkl}$ ). To prevent traits on different scales affecting the analysis, we centered all traits to a mean  
!88 of zero and standardized to a standard deviation of one prior to analysis. We then calculated the additive  
!89 genetic (co)variance matrix as four times the sire variance component. As traits were standardized prior to  
!90 analysis, genetic variances represent heritabilities. We found only four traits with heritabilities greater  
!91 than 0.1 (plant height, leaf area, leaf perimeter<sup>2</sup> / area<sup>2</sup> and leaf indent width; see Table S3), which we  
!92 then combined with field performance to study natural selection in the subsequent analyses, described  
!93 below.

194 We estimated the genetic covariance between the morphological traits and field performance by  
195 implementing the Robertson-Price Identity

$$196 \quad R = s_g = cov(w, z), \quad (4)$$

197 where the response to selection ( $R$ ) is analogous to the selection differential ( $s_g$ ), calculated as the genetic  
198 covariance between a trait ( $z$ ) and fitness ( $w$ ). Equation 4 then generalizes to multivariate form by  
199 including more phenotypic traits and estimating a genetic variance-covariance matrix ( $\mathbf{G}$ ), with fitness as  
200 the final trait. In this framework,  $s_g$  generalizes to the vector of selection gradients ( $\mathbf{s}_g$ ) representing the  
201 multivariate response to selection. Estimating the response to selection in this way includes both direct  
202 and indirect selection. To isolate the effect of direct selection on phenotypic responses, we can calculate  
203 the genetic selection gradient by combining  $\mathbf{G}$  and  $\mathbf{s}_g$  with

$$204 \quad \boldsymbol{\beta}_g = \mathbf{G}^{-1}\mathbf{s}_g, \quad (5)$$

205 where  $\boldsymbol{\beta}_g$  now represents a vector of genetic selection gradients (Lande and Arnold 1983; Rausher 1992),  
206 after removing the effect of genetic correlations among traits.

207 To estimate the predicted response to selection ( $\mathbf{s}_g$ ) in the ARF we estimated the (co)variance between the  
208 four morphology traits and field performance by implementing

$$209 \quad \mathbf{y}_{ijklm} = \mathbf{L}_i + \mathbf{S}_{j(ik)} + \mathbf{D}_{k(ij)} + \mathbf{S}_{j(ik)} \times \mathbf{D}_{k(ij)} + \mathbf{B}_l + \mathbf{e}_{m(ijkl)}, \quad (6)$$

210 where replicate genetic line ( $\mathbf{L}_i$ ) was the only fixed effect. Sire ( $\mathbf{S}_{j(ik)}$ ), dam ( $\mathbf{D}_{k(ij)}$ ) and their interaction  
211 ( $\mathbf{S}_{j(ik)} \times \mathbf{D}_{k(ij)}$ ) were included as random effects along with block within habitat ( $\mathbf{B}_l$ ). The multivariate  
212 response variable ( $\mathbf{y}_{ijklm}$ ) included four phenotypic traits as well as ability to reach maturity in each  
213 habitat. Fitness and morphology was measured on separate individuals (field versus glasshouse  
214 experiments), and so similar to equation 2, we estimated a heterogeneous residual covariance matrix.

215 Multiplying the sire variance component ( $\mathbf{S}_{j(ik)}$ ) by four (from equation 6) gave the additive genetic  
216 variance-covariance matrix ( $\mathbf{G}$ ). Elements in the first four rows and columns represented  $\mathbf{G}$  among  
217 morphological traits. Covariance elements in the fifth column (and row) denote the genetic covariance

between each trait and fitness ( $s_g$ ), with genetic variance in fitness in the final element (fifth row, fifth column); see Stinchcombe et al. (2014) for details. We used four separate implementations of equation 6 for field performance as the ability to reach maturity in each of the four transplant habitats. We calculated the additive genetic (co)variance matrix as four times the sire variance component and extracted  $s_g$  as the vector of covariances between morphological traits and field performance (rows one to four of the fifth column).

To identify whether we captured biologically meaningful differences in selection among habitats, we conducted two analyses. First,  $s_g$  and  $\beta_g$  being vectors, we calculated the dot product (representing vector length) of the observed and random matrices. If the observed length was greater than the length calculated from the random distribution, we took this as evidence we detected biologically meaningful estimates of selection for a given habitat (Stinchcombe et al. 2014; Walsh and Lynch 2018). Second, to quantify the differences in  $s_g$  among the four transplant habitats we estimated variance in selection gradients using

$$\mathbf{Z} = \begin{pmatrix} \sigma^2(s_{g1}) & \sigma(s_{g1}, s_{g2}) & \dots & \sigma(s_{g1}, s_{gn}) \\ & \sigma^2(s_{g2}) & \ddots & \vdots \\ & & & \sigma^2(s_{gn}) \end{pmatrix}, \quad (7)$$

where  $\mathbf{Z}$  then represents the among-habitat variance in  $s_g$  for the  $n$ th trait along the diagonal. The off-diagonal then contains the covariance in  $s_g$  among habitats, for each bivariate trait combination (Chenoweth et al. 2010). In the same way, we used equation 7 to calculate  $\mathbf{B}$ , the among-habitat (co)variance in  $\beta_g$ . Comparing the eigenvalues of observed and random (for both  $\mathbf{B}$  and  $\mathbf{Z}$ ) provided tests of significance. Observed eigenvalues with values greater than the random distribution of eigenvalues suggested we captured greater among-habitat differences in selection than expected by random sampling.

## Results

### *Comparing ARF and ecotype morphology*

Ecotypes showed strong differences in leaf morphology (Figure 1A), with the ARF exhibiting large variation, intermediate to the parental ecotypes (Figure 1B). Pairwise MANOVAs showed the ARF was significantly different to all ecotypes (Dune: Wilks'  $\lambda = 0.71$ ,  $F_{1,857} = 50.782$ ,  $P = <0.001$ ; Headland:

342 Wilks'  $\lambda = 0.64$ ,  $F_{1,863} = 69.747$ ,  $P = <0.001$ ; Tableland: Wilks'  $\lambda = 0.38$ ,  $F_{1,866} = 192.36$ ,  $P = <0.001$ ;  
343 Woodland: Wilks'  $\lambda = 0.22$ ,  $F_{1,864} = 445.1$ ,  $P = <0.001$ ). The MANOVA conducted on only the parental  
344 ecotypes described a significant difference among ecotypes in multivariate mean phenotype (Wilks'  $\lambda =$   
345  $0.03$ ,  $F_{3,362} = 117.86$ ,  $P = <0.001$ ), where differences among ecotypes captured 64% of the total variance.  
346 The first eigenvector of **D** ( $d_{\max}$ ) described 84% of phenotypic divergence mostly created by phenotypic  
347 differences between the Tableland and Headland ecotypes (Figure 1D). The second eigenvector ( $d_2$ )  
348 described 14% of variation in multivariate phenotype, describing differences between the Woodland and  
349 Tableland ecotypes (Figure 1D). The ARF occupied an area in phenotypic space close to the Dune  
350 ecotype, and intermediate between the Headland, Tableland and Woodland ecotypes. However, the ARF  
351 mean was not similar to that of the overall mean of all ecotypes, but exhibited high phenotypic variance  
352 that appeared to be missing some of the extreme phenotypes, especially from the Tableland and  
353 Woodland ecotypes (Figure 1D).

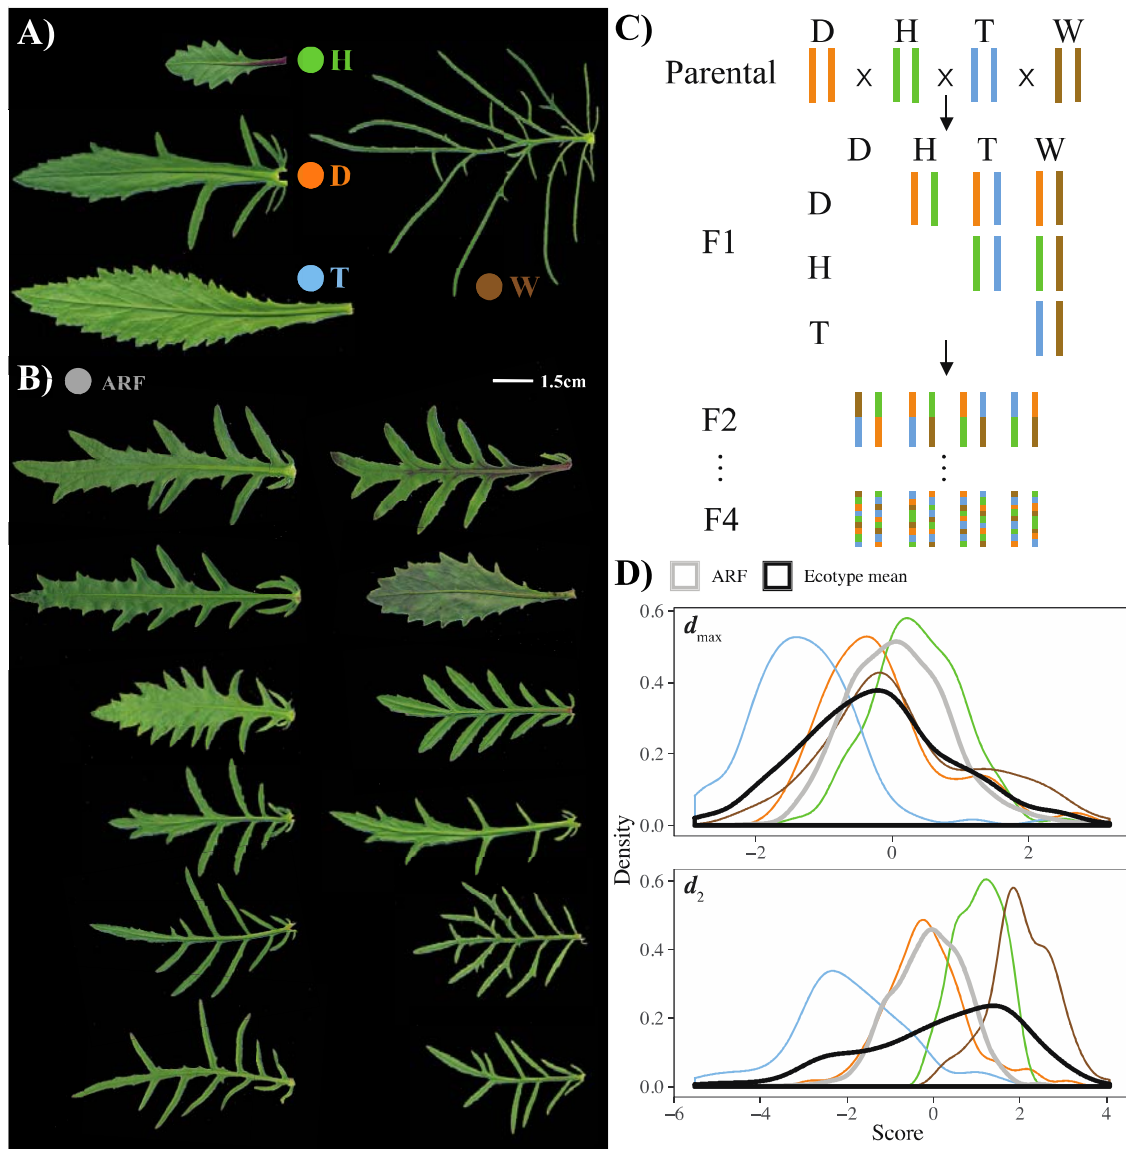

354 **Figure 1: A)** Ecotypes vary dramatically in leaf morphology. **B)** The ARF exhibited large variation in leaf morphology,  
 355 visually intermediate among the original ecotypes. **C)** The ARF was created by equally mating among all ecotypes. **D)** The  
 356 distribution of ecotype and ARF scores for the first two axes of **D** showing the ARF (grey) occupying an area in phenotypic  
 357 space similar to the mean of all ecotypes (black), but lacking extreme phenotypes, especially of the Tableland and Woodland  
 358 ecotypes.  
 359

360 *Comparing ARF and ecotype field performance*

361 Given ecotypes have shown adaptation to their contrasting habitats (Walter et al. 2016; Walter et al.  
 362 2018b), we expected that as an intermediate form, the ARF would show intermediate performance  
 363 between native and foreign populations. We found the performance of the ARF was similar to the native  
 364 ecotypes for seedling establishment and maturity (Figure 2), suggesting hybrid vigor despite several  
 365 generations of recombination.



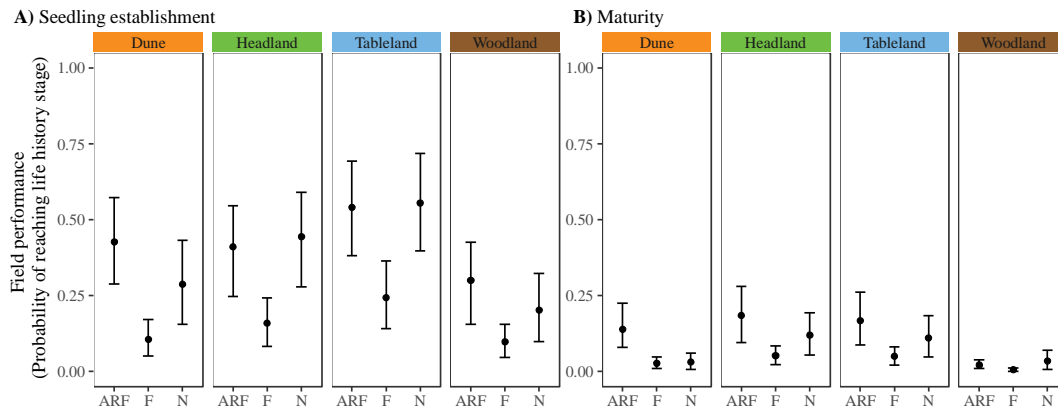

366  
367 **Figure 2:** Field performance of the ARF compared to foreign (F) and native (N) ecotypes in each transplant habitat. Fitness  
368 measured as the probability of reaching **A)** seedling establishment, and **B)** maturity. Credible intervals represent 95% HPD  
369 intervals.

### 370 *Genetic trade-offs among contrasting habitats*

371 If habitat-specific natural selection creates genetic trade-offs between contrasting habitats, we expected  
372 the ARF to show genetic variance for field fitness, and negative genetic covariance between contrasting  
373 habitats. However, given the ARF lacked the extreme phenotypes of the Headland, Tableland and  
374 Woodland ecotypes (Figure 1), and exhibited relatively high field performance (Figure 2), we might  
375 expect low genetic variance associated with either zero genetic covariance or a positive genetic  
376 covariance between habitats. We found that across the four habitats, additive genetic variance increased  
377 as life history stages progressed (Figure 3). Observed estimates of genetic variance in field performance  
378 were within the random distribution at emergence, but were greater than the random distribution for  
379 maturity (Figure 3). In the headland and tableland habitats we detected lower genetic variance than  
380 expected by chance for seedling establishment.

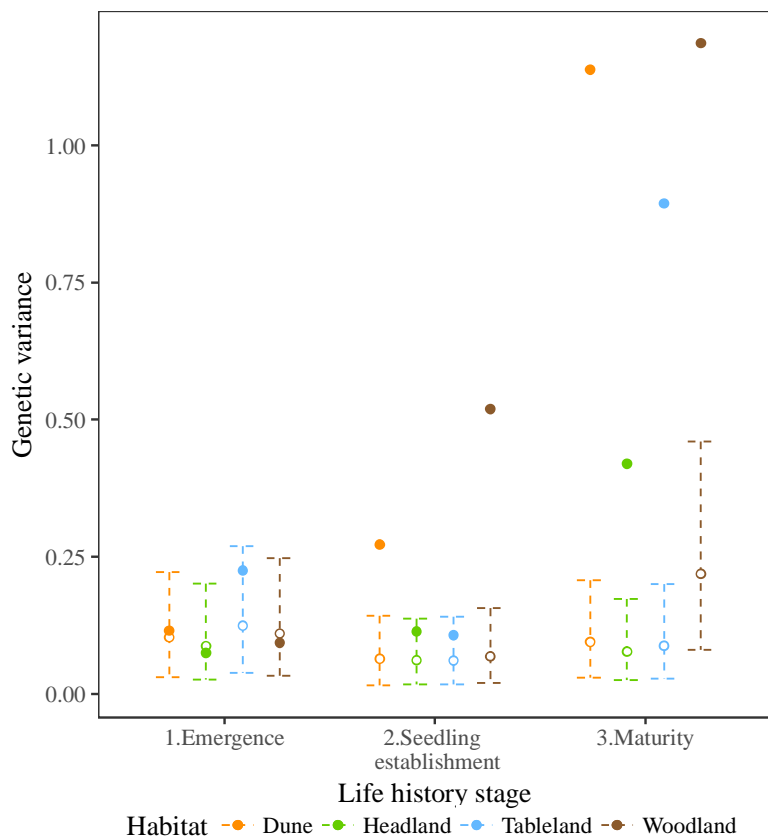

381 Habitat — Dune — Headland — Tableland — Woodland  
382 **Figure 3:** Genetic variance for field performance in the ARF for each habitat (coloured circles and lines) and at each life  
383 history stage. Filled circles represent the observed estimates of genetic variance, with dashed lines and unfilled circles  
384 representing the random distribution. Additive genetic variance in fitness increased through life history. Credible intervals  
385 represent 95% HPD intervals.

386 Decomposing the genetic covariance matrix described orthogonal axes of genetic variation underlying  
387 field fitness. Decomposing the matrix for each life history stage, we found the first three eigenvectors for  
388 maturity described more genetic variance than expected under random sampling (Figure 4). Interpreting  
389 the loadings of each eigenvector reveal how each habitat contributes to describing the genetic variance in  
390 fitness quantified by that eigenvector. Habitats with loadings of the same sign describe shared genetic  
391 variance for fitness, whereas loadings of different signs describe differences in genetic variance and  
392 provide evidence of fitness trade-offs. We found all habitats contributed equally to describing genetic  
393 variance underlying the first eigenvector, suggesting it described heterosis or shared genetic variation  
394 needed to function in stressful environments (Table 1). However, eigenvectors two and three provided  
395 evidence of genetic tradeoffs, describing genetic variance in fitness that differed between the woodland  
396 and dune ecotypes ( $e_2$ ), and between the tableland, and the dune and woodland transplant habitats ( $e_3$ ;  
397 Table 1). Eigenvector 4 did not describe biologically meaningful genetic variance (Figure 4), but  
398 described differences in genetic variance between the headland, and dune and tableland habitats. The

posterior mean G-matrices and genetic correlations for field performance are located in supplementary

Table S4.

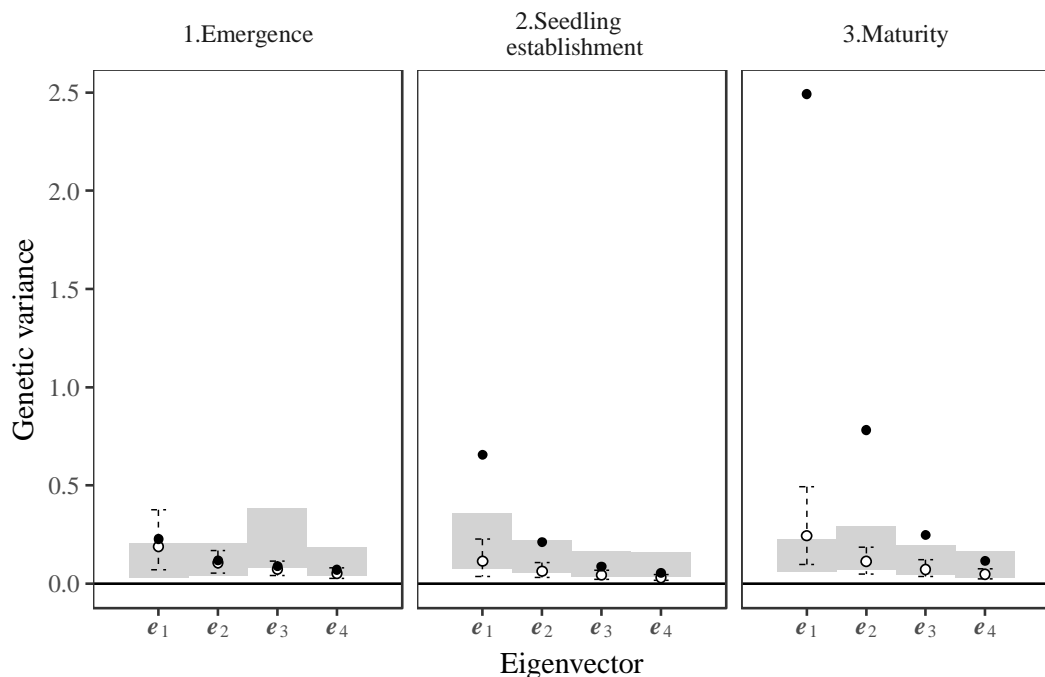

**Figure 4:** Comparing the amount of genetic variance described by eigenvectors representing the observed (filled circles) versus random matrices (unfilled circles and dashed lines), for each life history stage. Gray bars represent the amount of genetic variance in the randomized matrices described by the observed eigenvectors. Only the first three eigenvectors for maturity described more genetic variance than expected by random sampling. Credible intervals represent 95% HPD intervals.

**Table 1:** Eigenanalysis of the additive genetic (co)variance matrix for field performance at maturity. Loadings in bold are greater than 0.25 to aid interpretation. HPD represents the observed 95% HPD credible intervals.

| Eigenvectors | $e_1$           | $e_2$           | $e_3$           | $e_4$           |
|--------------|-----------------|-----------------|-----------------|-----------------|
| Eigenvalue   | 2.492           | 0.782           | 0.248           | 0.116           |
| HPD          | 0.837-<br>4.179 | 0.036-<br>1.984 | 0.037-<br>0.569 | 0.011-<br>0.267 |
| Proportion   | 0.685           | 0.215           | 0.068           | 0.032           |
| Habitat      |                 |                 |                 |                 |
| Dune         | <b>-0.56</b>    | <b>0.61</b>     | <b>0.45</b>     | <b>-0.34</b>    |
| Headland     | <b>-0.34</b>    | 0.22            | -0.04           | <b>0.91</b>     |
| Tableland    | <b>-0.54</b>    | -0.02           | <b>-0.81</b>    | <b>-0.23</b>    |
| Woodland     | <b>-0.53</b>    | <b>-0.76</b>    | <b>0.37</b>     | 0.00            |

Overall, our results showed strong patterns of adaptive divergence (Figure 2), and although there appears to be a common genetic basis to fitness in all environments ( $e_1$ ; Table 1) we also detected genetic trade-offs for fitness among certain habitats (Table 1). Despite strong adaptive divergence in Figure 2, the headland and tableland habitats exhibited weaker additive genetic variance for fitness (Figure 5), and weaker genetic trade-offs with other environments (Table 1), when compared to the dune and woodland. This suggested alleles lost during F2 hybrid breakdown contributed to both genetic incompatibilities and

‡15 adaptive genetic variation that was lost in the ARF, reducing genetic variance for field performance in  
‡16 certain environments and producing weaker genetic trade-offs than expected. To test this, for each habitat  
‡17 we compared the strength of adaptive divergence (Figure 2; native ecotype performance – foreign ecotype  
‡18 performance) against the level of genetic variance exhibited by the ARF. As predicted, we found a strong  
‡19 negative association for seedling establishment and a weaker negative association for maturity (Figure 5),  
‡20 suggesting alleles associated with strong adaptive divergence were also responsible for genetic  
‡21 incompatibilities.

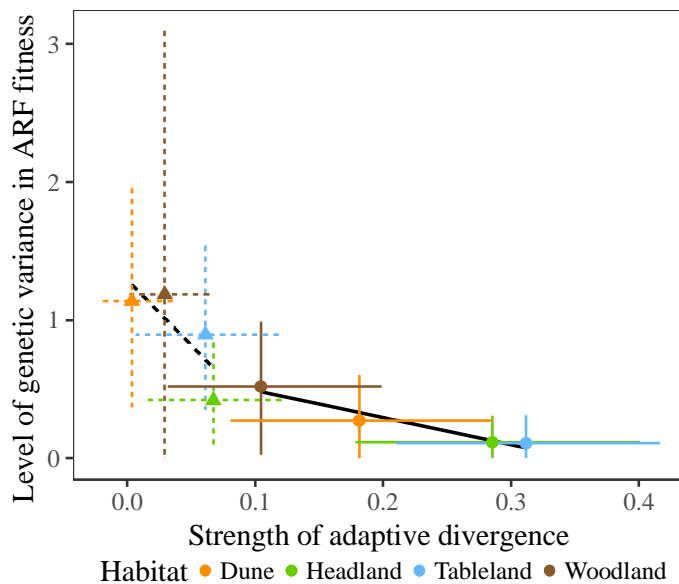

‡22 **Figure 5:** Stronger adaptive divergence was negatively associated with the level of genetic variance. The strength of adaptive  
‡23 divergence measured as the difference in fitness between the native ecotype and foreign parental ecotypes, versus the level of  
‡24 genetic variance in the ARF, for the same habitat. Solid circles and lines represent seedling establishment, triangles and dashed  
‡25 lines represent the ability to reach maturity. Credible intervals represent 95% HPD intervals. Estimating a regression slope for  
‡26 each MCMC iteration showed a significant negative association at 88% HPD for seedling establishment, but a non-significant  
‡27 relationship for maturity.  
‡28

### ‡29 *Natural selection on morphological traits*

‡30 To quantify selection in each habitat we calculated  $s_g$  as the genetic covariance between morphological  
‡31 traits measured in the glasshouse, and field performance measured in each of the four transplant habitats.  
‡32 We then isolated direct selection by calculating  $\beta_g$ , the genetic selection gradient for each habitat.  
‡33 Comparing the length of observed and random  $s_g$  and  $\beta_g$  suggested we captured biologically meaningful  
‡34 selection within each habitat (Figure S5A). To quantify differences in selection among habitats we  
‡35 estimated  $\mathbf{B}$  and  $\mathbf{Z}$  as the among-habitat (co)variance in selection vectors. Comparison of observed and  
‡36 random eigenvalues showed that both selection vectors exhibited greater differences among habitats than

‡37 expected by random sampling (Figure S5B), suggesting differences in our observed selection vectors  
‡38 described biologically meaningful differences in natural selection among transplant habitats.  
‡39 If differences in natural selection among the four habitats occurred in the direction of adaptive evolution,  
‡40 we would expect differences in  $s_g$ , but not  $\beta_g$ , to align with divergence in mean phenotype of the parental  
‡41 ecotypes. Eigenanalysis of  $\mathbf{B}$  and  $\mathbf{Z}$  quantifies the axes that describe differences among the original  
‡42 selection vectors, with the first axis for each matrix representing 83% (HPD 56-98%) and 81% (HPD 55-  
‡43 98%) of the total variance, respectively. We tested whether the first axis from each selection vector  
‡44 aligned with  $d_{\max}$ , the axis describing the greatest difference in multivariate phenotype mean. To do so,  
‡45 we calculated the angle between the first eigenvector of  $\mathbf{B}$  and  $\mathbf{Z}$ , and  $d_{\max}$ . We found the alignment  
‡46 between  $\mathbf{Z}$  and  $\mathbf{D}$ , but not  $\mathbf{B}$ , was closer than expected with random sampling (Figure 6A). To  
‡47 complement this analysis, we conducted a more extensive analysis using a covariance tensor approach,  
‡48 which is provided in supplementary material. Results obtained from both analyses matched closely,  
‡49 suggesting the response to selection, but not the direction of selection, aligned with divergence in parental  
‡50 ecotype morphology.

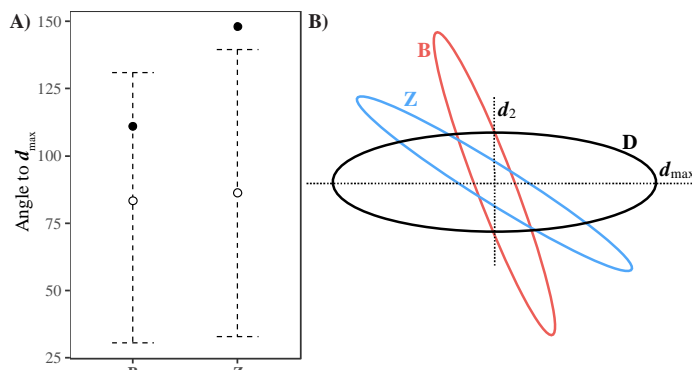

‡51 **Figure 6:** Differences in  $s_g$ , but not  $\beta_g$ , aligned with  $d_{\max}$ , but differences in  $\beta_g$  aligned with  $d_2$ . **A)** The angle between the first  
‡52 eigenvector of  $\mathbf{Z}$ , and  $d_{\max}$  was closer than expected by random sampling, but the first eigenvector of  $\mathbf{B}$  did not show a close  
‡53 alignment with  $d_{\max}$ . Credible intervals represent 90% HPD intervals. **B)** Two-dimensional schematic approximately  
‡54 representing the orientation of  $\mathbf{B}$  and  $\mathbf{Z}$  in relation to  $\mathbf{D}$ , and  $d_{\max}$ .  
‡55

## ‡56 Discussion

‡57 Here, we have used ecotype-specific genetic variation to connect adaptation and speciation during  
‡58 adaptive radiation. We found that an ARF exhibited a multivariate phenotype intermediate to the four  
‡59 parental ecotypes, but was lacking in much of the phenotypic variation of the parental ecotypes. Genetic  
‡60 variance for fitness in the ARF was lower when transplanted into habitats associated with stronger

l61 differences between native and foreign parental fitness. Genetic trade-offs in field performance among  
l62 habitats were only observed in axes describing smaller amounts of genetic variance underlying field  
l63 fitness. Despite only one generation of selection, among-habitat differences in the response to selection  
l64 aligned with the direction of morphological divergence of the original ecotypes, but only when genetic  
l65 correlations were removed. Together, our results provide empirical evidence suggesting interactions  
l66 between genetic incompatibilities and divergent natural selection created adaptive radiation of an  
l67 Australian wildflower into four contrasting habitats.

l68 While there is abundant evidence implicating divergent natural selection in the accumulation of extrinsic  
l69 reproductive barriers such as immigrant inviability and ecologically dependent postzygotic isolation  
l70 (reviewed in Baack et al. 2015), the contribution of adaptation to the evolution of genetic  
l71 incompatibilities during population divergence remains unresolved (Baack et al. 2015). Many genes  
l72 underlying postzygotic isolation show the signature of past rapid evolution, but connecting genes  
l73 underlying both adaptation and reproductive isolation are rare (Presgraves 2010). In *Mimulus guttatus*, a  
l74 gene underlying copper tolerance was also associated with genetic incompatibilities (Macnair and  
l75 Christie 1983). Our results further clarify the connection between adaptation and the evolution of genetic  
l76 incompatibilities by showing that intrinsic reproductive isolation in F2 hybrids was associated with the  
l77 loss of extreme phenotypic variation, and the alleles underlying these incompatibilities were likely  
l78 adaptive.

l79 We suggest that environment-specific dominant alleles link extreme phenotypes with natural selection  
l80 and reproductive isolation to create adaptive radiation in these contrasting ecotypes. This is because  
l81 heterozygotes (with alleles from different ecotypes) at one or more loci underlie F2 hybrid breakdown,  
l82 creating negative additive  $\times$  dominant or dominant  $\times$  dominant interactions (Demuth and Wade 2005;  
l83 Willett 2006), suggesting genetic incompatibilities at the F2 generation are largely produced by dominant  
l84 alleles (e.g., Sweigart et al. 2006; Latta et al. 2007). Our F2 hybrid was constructed by mating between  
l85 two completely unrelated F1 crosses (Figure 1C; e.g.,  $F1_{\text{Dune,Headland}} \times F1_{\text{Tableland,Woodland}}$ ), increasing  
l86 heterozygosity compared to traditional F2 crosses between two populations, and reducing the likelihood of

l87 homozygous recessive loci (detailed explanation of the crossing design is located in supplementary  
l88 material). Dominant alleles will be more visible to selection, allowing them to increasing in frequency  
l89 rapidly and create rapid adaptive divergence. Whether these alleles then contribute to the evolution of  
l90 stronger genetic incompatibilities (e.g., F1 hybrid breakdown) remains unexplored.

l91 F2 hybrid breakdown indicates population divergence as a build-up of coadapted gene complexes, created  
l92 when selection assembles beneficial combinations of alleles (Cutter 2012; Corbett-Detig et al. 2013). In  
l93 this system, it is likely the evolution of coadapted gene complexes were responsible for the rise of  
l94 intrinsic reproductive isolation during the early stages of speciation (Corbett-Detig et al. 2013). We can  
l95 then view the evolution of these ecotypes from a perspective where selection acts upon additive genetic  
l96 variation by increasing allele frequencies at independent loci (Hill et al. 2008), but limited recombination  
l97 due to small population size, maladaptive gene flow or strong selection creates coadapted gene complexes  
l98 (Mayr 1954; Carson and Templeton 1984; Ortiz-Barrientos et al. 2016). The strength of coadaptation  
l99 within a population will then determine how genetic incompatibilities arise among populations and lead  
i00 to speciation.

i01 The strength of divergence (and consequently, reproductive isolation) among coadapted gene complexes  
i02 will be population and environment specific, and depend on the interaction between mutation, migration,  
i03 drift and selection. Previous studies of Dune-Headland parapatric pairs along the Australian coastline  
i04 have shown convergent evolution, suggesting multiple independent origins of these ecotypes (Roda et al.  
i05 2013b; Roda et al. 2017). If the same dominant alleles important for adaptation to these contrasting  
i06 environments are repeatedly selected in the same environment, they may form coadapted gene complexes  
i07 within populations of each environment, with drift or local adaptation causing differences among  
i08 localities (Goodnight 2000). Whether locally adapted coadapted gene complexes between locations of the  
i09 same species will give rise to reproductive isolation remains unexplored, but could provide important  
i10 insights into the relationship between adaptation and divergence across a heterogeneous landscape.

i11 Genetic variance for life history and fitness traits is often low (e.g., McFarlane et al. 2014), and often  
i12 decreases with ontogeny (e.g., Aguirre et al. 2014). In contrast, we showed increased genetic variance

i13 with development, results similar to recent studies in the laboratory (Styga et al. 2018). Changes in  
i14 genetic variance underlying fitness have profound implications for understanding adaptation and  
i15 responses to environmental change (Sgrò and Hoffmann 2004). If genetic correlations among traits under  
i16 selection change during ontogeny, the effects of selection will not be linear as organisms develop and will  
i17 depend on changes in the combination of genetic variation and selection pressures over time. As different  
i18 trait combinations will be available to selection at different developmental points, patterns of adaptation  
i19 will be determined by the combination of traits visible when selection is strong (Bourret et al. 2017; Styga  
i20 et al. 2018). Consequently, it will be important to consider the relationship between changes in genetic  
i21 correlations and changes in natural selection, as development proceeds.

i22 The alignment of phenotypic divergence ( $\mathbf{D}$ ) with differences in the response to selection ( $s_g$ ), but not the  
i23 genetic selection gradients ( $\beta_g$ ), suggests that constraints to adaptation would exist if the ARF was left to  
i24 evolve in the natural environments. This is because after one generation of selection, the mean phenotype  
i25 was expected to follow divergence towards the parental ecotypes, but selection in the absence of genetic  
i26 correlations among traits was in a direction different to phenotypic divergence. We must be circumspect  
i27 in this interpretation because estimation of  $\beta_g$  assumes we have included all traits under selection,  
i28 whereas  $s_g$  does not suffer from the same limitation (Morrissey et al. 2012; Stinchcombe et al. 2014).  
i29 However, this caveat applies to predicting future natural selection, and is less important for our analyses  
i30 because we are testing whether genetic architecture ( $s_g$ ) or the directions of selection ( $\beta_g$ ), predicts the  
i31 result of past evolutionary divergence ( $\mathbf{D}$ ).

i32 Previously we showed that genetic variance has evolved, and diverged among these ecotypes, which  
i33 aligned with the direction of morphological evolution (Walter et al. 2018a). This suggested that genetic  
i34 constraints have limited capacity to constrain adaptation during adaptive radiation, or genetic variance  
i35 can evolve to reduce genetic constraints as evolution proceeds. Given we observed ecotypic divergence in  
i36 the genetic relationship among traits (Walter et al. 2018a), but also genetic constraints in the ARF after  
i37 ecotype-specific adaptive alleles were lost, we believe the loss of ecotype-specific adaptive alleles has re-  
i38 created the constraints present during the very early stages of adaptive divergence. During the early stages



i39 of adaptive radiation, adaptation will be constrained to follow  $g_{\max}$  (Lande and Arnold 1983; Arnold  
i40 1992; Schluter 1996). As environment specific adaptive alleles increase in frequency,  $g_{\max}$  alters to align  
i41 with the phenotypic optimum and evolution is determined by the long-term correlated response to  
i42 selection (Zeng 1988). Thus, adaptive radiation occurs when environment-specific alleles increase in  
i43 frequency, causing changes in the distribution of genetic variance and ameliorates genetic constraints as  
i44 adaptive divergence proceeds.

i45 In conclusion, we identified patterns of phenotypic and adaptive divergence among recently derived  
i46 ecotypes, created by the accumulation of environment-specific alleles in response to natural selection. We  
i47 show that these alleles likely created ecotype-specific adaptive phenotypes and fitness trade-offs between  
i48 habitats that also lead to genetic incompatibilities between divergent ecotypes and reduced genetic  
i49 constraints to adaptation in response to divergent natural selection. Through these experiments we  
i50 identify the connection between microevolutionary genetic changes and macroevolutionary  
i51 diversification in the context of an adaptive radiation.

## i52 **Acknowledgements**

i53 We are indebted to Mal Smith, Ruth and Andrew Shaw, and the Ballina Shire Council for generously  
i54 allowing access to the transplant sites. We are very grateful to M. James, C. Palmer, S. Edgley, J.  
i55 Walter, L. Ambrose, B. Ayalon, S. Carrol, M. Gallo, F. Roda, A. Maynard, and H. North for their  
i56 help with the fieldwork. This project was funded by Australian Research Council grants to DO-B.

## i57 **References**

- i58 Aguirre, J. D., M. W. Blows, and D. J. Marshall. 2014. The genetic covariance between life cycle stages  
i59 separated by metamorphosis. *Proceedings of the Royal Society B-Biological Sciences* 281.  
i60 Ali, S. I. 1969. *Senecio lautus* Complex in Australia .5. Taxonomic interpretations. *Australian Journal of*  
i61 *Botany* 17:161-176.  
i62 Anderson, J. T., C. R. Lee, C. A. Rushworth, R. I. Colautti, and T. Mitchell-Olds. 2013. Genetic trade-  
i63 offs and conditional neutrality contribute to local adaptation. *Molecular Ecology* 22:699-708.  
i64 Anderson, J. T., J. H. Willis, and T. Mitchell-Olds. 2011. Evolutionary genetics of plant adaptation.  
i65 *Trends in Genetics* 27:258-266.  
i66 Arnold, S. J. 1992. Constraints on Phenotypic Evolution. *The American Naturalist* 140:S85-S107.  
i67 Baack, E., M. C. Melo, L. H. Rieseberg, and D. Ortiz-Barrientos. 2015. The origins of reproductive  
i68 isolation in plants. *New Phytologist*.  
i69 Bourret, A., M. Bélisle, F. Pelletier, and D. Garant. 2017. Evolutionary potential of morphological traits  
i70 across different life-history stages. *Journal of Evolutionary Biology* 30:616-626.

- i71 Bylesjo, M., V. Segura, R. Y. Soolanayakanahally, A. M. Rae, J. Trygg, P. Gustafsson, S. Jansson et al.  
i72 2008. LAMINA: a tool for rapid quantification of leaf size and shape parameters. *BMC Plant*  
i73 *Biology* 8.
- i74 Carson, H. L., and A. R. Templeton. 1984. Genetic Revolutions in Relation to Speciation Phenomena -  
i75 the Founding of New Populations. *Annual Review of Ecology and Systematics* 15:97-131.
- i76 Chenoweth, S. F., H. D. Rundle, and M. W. Blows. 2010. The contribution of selection and genetic  
i77 constraints to phenotypic divergence. *The American Naturalist* 175:186-196.
- i78 Cheverud, J. M. 1982. Phenotypic, Genetic, and Environmental Morphological Integration in the  
i79 Cranium. *Evolution* 36:499-516.
- i80 Corbett-Detig, R. B., J. Zhou, A. G. Clark, D. L. Hartl, and J. F. Ayroles. 2013. Genetic incompatibilities  
i81 are widespread within species. *Nature* 504:135-137.
- i82 Coyne, J. A., and H. A. Orr. 2004. *Speciation*. Sunderland, MA, Sinauer Associates.
- i83 Cutter, A. D. 2012. The polymorphic prelude to Bateson-Dobzhansky-Muller incompatibilities. *Trends in*  
i84 *Ecology & Evolution* 27:209-218.
- i85 Demuth, J. P., and M. J. Wade. 2005. On the theoretical and empirical framework for studying genetic  
i86 interactions within and among species. *The American Naturalist* 165:524-536.
- i87 Dobzhansky, T. G. 1937. *Genetics and the origin of species*. New York, Columbia University Press.
- i88 Doroszuk, A., M. W. Wojewodzcic, G. Gort, and J. E. Kammenga. 2008. Rapid divergence of genetic  
i89 variance-covariance matrix within a natural population. *The American Naturalist* 171:291-304.
- i90 Eroukhmanoff, F., and E. I. Svensson. 2011. Evolution and stability of the G-matrix during the  
i91 colonization of a novel environment. *Journal of Evolutionary Biology* 24:1363-1373.
- i92 Goodnight, C. J. 2000. Quantitative trait loci and gene interaction: the quantitative genetics of  
i93 metapopulations. *Heredity (Edinb)* 84:587-598.
- i94 Hadfield, J. D. 2010. MCMC Methods for Multi-Response Generalized Linear Mixed Models: The  
i95 MCMCglmm R Package. *Journal of Statistical Software* 33:1-22.
- i96 Hill, W. G., M. E. Goddard, and P. M. Visscher. 2008. Data and theory point to mainly additive genetic  
i97 variance for complex traits. *PLoS Genet* 4:e1000008.
- i98 Kondrashov, A. S. 2003. Accumulation of Dobzhansky-Muller incompatibilities within a spatially  
i99 structured population. *Evolution* 57:151-153.
- i00 Lande, R. 1979. Quantitative Genetic Analysis of Multivariate Evolution, Applied to Brain:Body Size  
i01 Allometry. *Evolution* 33:402-416.
- i02 Lande, R., and S. J. Arnold. 1983. The Measurement of Selection on Correlated Characters. *Evolution*  
i03 37:1210-1226.
- i04 Latta, R. G., K. M. Gardner, and A. D. Johansen-Morris. 2007. Hybridization, recombination, and the  
i05 genetic basis of fitness variation across environments in *Avena barbata*. *Genetica* 129:167-177.
- i06 Macnair, M. R., and P. Christie. 1983. Reproductive isolation as a pleiotropic effect of copper tolerance  
i07 in *Mimulus guttatus*? *Heredity* 50:295-302.
- i08 Martin, G., E. Chapuis, and J. Goudet. 2008. Multivariate  $Q_{st}$ - $F_{st}$  Comparisons: A Neutrality Test for the  
i09 Evolution of the G Matrix in Structured Populations. *Genetics* 180:2135-2149.
- i10 Mayr, E. 1954. Change of genetic environment and evolution, Pages 157-180 in J. Huxley, A. C. Hardy,  
i11 and E. B. Ford, eds. *Evolution as a process*. London, Allen and Unwin.
- i12 McFarlane, S. E., J. C. Gorrell, D. W. Coltman, M. M. Humphries, S. Boutin, and A. G. McAdam. 2014.  
i13 Very low levels of direct additive genetic variance in fitness and fitness components in a red  
i14 squirrel population. *Ecology and Evolution* 4:1729-1738.
- i15 Melo, M. C., A. Grealy, B. Brittain, G. M. Walter, and D. Ortiz-Barrientos. 2014. Strong extrinsic  
i16 reproductive isolation between parapatric populations of an Australian groundsel. *New*  
i17 *Phytologist* 203:323-334.
- i18 Morrissey, M. B., D. J. Parker, P. Korsten, J. M. Pemberton, L. E. Kruuk, and A. J. Wilson. 2012. The  
i19 prediction of adaptive evolution: empirical application of the secondary theorem of selection and  
i20 comparison to the breeder's equation. *Evolution* 66:2399-2410.
- i21 Muller, H. J. 1942. Isolating mechanisms, evolution and temperature. *Biology Symposium* 6.
- i22 Navarro, A., and N. H. Barton. 2003. Accumulating postzygotic isolation genes in parapatry: a new twist  
i23 on chromosomal speciation. *Evolution* 57:447-459.

- i24 Ortiz-Barrientos, D., J. Engelstädter, and L. H. Rieseberg. 2016. Recombination Rate Evolution and the  
i25 Origin of Species. *Trends in Ecology & Evolution* 31:226-236.
- i26 Presgraves, D. C. 2010. Darwin and the Origin of Interspecific Genetic Incompatibilities. *The American*  
i27 *Naturalist* 176:S45-S60.
- i28 Pujol, B., S. Blanchet, A. Charmantier, E. Danchin, B. Facon, P. Marrot, F. Roux et al. 2018. The  
i29 Missing Response to Selection in the Wild. *Trends in Ecology & Evolution* 33:337-346.
- i30 R Core Team. 2016. R: A language and environment for statistical computing, version v. 3.3.2. R  
i31 Foundation for Statistical Computing, Vienna, Austria.
- i32 Radford, I. J., R. D. Cousens, and P. W. Michael. 2004. Morphological and genetic variation in the  
i33 *Senecio pinnatifolius* complex: are variants worthy of taxonomic recognition? *Australian*  
i34 *Systematic Botany* 17:29-48.
- i35 Rausher, M. D. 1992. The Measurement of Selection on Quantitative Traits: Biases Due to Environmental  
i36 Covariances between Traits and Fitness. *Evolution* 46:616-626.
- i37 Richards, T. J., and D. Ortiz-Barrientos. 2016. Immigrant inviability produces a strong barrier to gene  
i38 flow between parapatric ecotypes of *Senecio lautus*. *Evolution* 70:1239-1248.
- i39 Richards, T. J., G. M. Walter, K. McGuigan, and D. Ortiz-Barrientos. 2016. Divergent natural selection  
i40 drives the evolution of reproductive isolation in an Australian wildflower. *Evolution* 70:1993-  
i41 2003.
- i42 Robinson, M. R., and A. P. Beckerman. 2013. Quantifying multivariate plasticity: genetic variation in  
i43 resource acquisition drives plasticity in resource allocation to components of life history. *Ecology*  
i44 *Letters* 16:281-290.
- i45 Roda, F., L. Ambrose, G. M. Walter, H. L. L. Liu, A. Schaul, A. Lowe, P. B. Pelsler et al. 2013a.  
i46 Genomic evidence for the parallel evolution of coastal forms in the *Senecio lautus* complex.  
i47 *Molecular Ecology* 22:2941-2952.
- i48 Roda, F., H. L. Liu, M. J. Wilkinson, G. M. Walter, M. E. James, D. M. Bernal, M. C. Melo et al. 2013b.  
i49 Convergence and Divergence during the Adaptation to Similar Environments by an Australian  
i50 Groundsel. *Evolution* 67:2515-2529.
- i51 Roda, F., G. M. Walter, R. Nipper, and D. Ortiz-Barrientos. 2017. Genomic clustering of adaptive loci  
i52 during parallel evolution of an Australian wildflower. *Molecular Ecology* 26:3687-3699.
- i53 Schluter, D. 1996. Adaptive radiation along genetic lines of least resistance. *Evolution* 50:1766-1774.
- i54 Sgrò, C. M., and A. A. Hoffmann. 2004. Genetic correlations, tradeoffs and environmental variation.  
i55 *Heredity* 93:241-248.
- i56 Stinchcombe, J. R., A. K. Simonsen, and M. W. Blows. 2014. Estimating Uncertainty in Multivariate  
i57 Responses to Selection. *Evolution* 68:1188-1196.
- i58 Styga, J. M., T. M. Houslay, A. J. Wilson, and R. L. Earley. 2018. Development of G: a test in an  
i59 amphibious fish. *Heredity*.
- i60 Sweigart, A. L., L. Fishman, and J. H. Willis. 2006. A simple genetic incompatibility causes hybrid male  
i61 sterility in *Mimulus*. *Genetics* 172:2465-2479.
- i62 Walsh, B., and M. W. Blows. 2009. Abundant Genetic Variation plus Strong Selection = Multivariate  
i63 Genetic Constraints: A Geometric View of Adaptation. *Annual Review of Ecology Evolution and*  
i64 *Systematics* 40:41-59.
- i65 Walsh, B., and M. Lynch. 2018, *Evolution and selection of quantitative traits*. Oxford, Oxford University  
i66 Press.
- i67 Walter, G. M., J. D. Aguirre, M. W. Blows, and D. Ortiz-Barrientos. 2018a. Evolution of genetic variance  
i68 during adaptive radiation. *The American Naturalist* 191:E108-E128.
- i69 Walter, G. M., M. J. Wilkinson, J. D. Aguirre, M. W. Blows, and D. Ortiz-Barrientos. 2018b.  
i70 Environmentally induced development costs underlie fitness tradeoffs. *Ecology* 99:1391-1401.
- i71 Walter, G. M., M. J. Wilkinson, M. E. James, T. J. Richards, J. D. Aguirre, and D. Ortiz-Barrientos. 2016.  
i72 Diversification across a heterogeneous landscape. *Evolution* 70:1979-1992.
- i73 Willett, C. S. 2006. Deleterious epistatic interactions between electron transport system protein-coding  
i74 loci in the copepod *Tigriopus californicus*. *Genetics* 173:1465-1477.
- i75 Zeng, Z. B. 1988. Long-Term Correlated Response, Interpopulation Covariation, and Interspecific  
i76 Allometry. *Evolution* 42:363-374.
- i77
